# Supplementary material for: Photo-energy conversion efficiency of CH3NH3PbI3/C60 heterojunction perovskite solar cells from first-principles
Source: Royal Society of Chemistry journal article supplement (doi:10.1039/d0ma00853b), 2020-12-29
Supplement: d0ma00853b1.pdf [file d0ma00853b1.pdf]

## Supplementary Information

# Photo-energy Conversion Efficiency of $\text{CH}_3\text{NH}_3\text{PbI}_3/\text{C}_{60}$ Heterojunction Perovskite Solar Cells from First-principles

Khian-Hooi Chew,<sup>1</sup> Riichi Kuwahara,<sup>2</sup> and Kaoru Ohno<sup>3</sup>

<sup>1</sup>*Department of Physics, University of Malaya, 50603 Kuala Lumpur, Malaysia.*

<sup>2</sup>*Dassault Systèmes, ThinkPark Tower, 2-1-1 Osaki, Shinagawa-ku, Tokyo 141-6020, Japan*

<sup>3</sup>*Department of Physics, Yokohama National University, 79-5 Tokiwadai, Hogogaya-ku, Yokohama 240-8501, Japan.*

**Section 1: Summarized of numerical values in tables**

**Table S1. Calculated total DFT-D energy and the relative energies of a  $\text{CH}_3\text{NH}_3\text{PbI}_3/\text{C}_{60}$  heterojunction with tetragonal and cubic perovskites.**

| Surface geometry | Location of $\text{C}_{60}$ on $\text{MAPbI}_3$ surface | tetragonal $\text{MAPbI}_3$ ( <i>t</i> -MAI) |                                                         | cubic $\text{MAPbI}_3$ ( <i>c</i> -MAI) |                                                         |
|------------------|---------------------------------------------------------|----------------------------------------------|---------------------------------------------------------|-----------------------------------------|---------------------------------------------------------|
|                  |                                                         | Total DFT-D energy [eV]                      | Total energy relative to the topC ( <i>t</i> -MAI) [eV] | Total DFT-D energy [eV]                 | Total energy relative to the topC ( <i>t</i> -MAI) [eV] |
| topC             | aboveC                                                  | -33358486.71                                 | 0.000                                                   | -33358486.1                             | 0.610                                                   |
|                  | aboveI                                                  | -33358486.02                                 | 0.696                                                   | -                                       | -                                                       |
|                  | bridge                                                  | -33358486.54                                 | 0.176                                                   | -33358484.08                            | 2.636                                                   |
| topN             | aboveN                                                  | -33358483.92                                 | 2.792                                                   | -33358485.28                            | 1.437                                                   |
|                  | aboveI                                                  | -33358484.16                                 | 2.556                                                   | -33358486.05                            | 0.659                                                   |
|                  | bridge                                                  | -33358483.83                                 | 2.884                                                   | -33358485.29                            | 1.420                                                   |
| apolar           | aboveC                                                  | -33358484.73                                 | 1.988                                                   | -33358485.45                            | 1.262                                                   |
|                  | aboveN                                                  | -33358484.84                                 | 1.878                                                   | -33358485.2                             | 1.513                                                   |
|                  | aboveI                                                  | -33358484.78                                 | 1.931                                                   | -33358485.61                            | 1.101                                                   |
|                  | bridge                                                  | -33358484.83                                 | 1.887                                                   | -33358486.26                            | 0.455                                                   |

**Table S2.** Calculated energy gap  $E_g$ , the dissociated energy of the electron-hole pair  $\Delta E$  and energy conversion efficiency  $\eta$  of a  $\text{CH}_3\text{NH}_3\text{PbI}_3/\text{C}_{60}$  heterojunction with tetragonal-phase perovskites.  $\Delta E^*$  and  $\eta^*$  denote the dissociated energy and the energy conversion efficiency obtained based on the three-fold degenerate LUMO of  $\text{C}_{60}$  fullerene.

| Surface geometry | Location of $\text{C}_{60}$ on $\text{MAPbI}_3$ | $E_g$ [eV] | $\Delta E$ [eV] | $\eta$ [%] | $\Delta E^*$ [eV] | $\eta^*$ [%] |
|------------------|-------------------------------------------------|------------|-----------------|------------|-------------------|--------------|
| <b>topC</b>      | aboveC                                          | 1.715      | 0.704           | 14.22      | 0.693             | 14.43        |
|                  | aboveI                                          | 1.409      | 0.484           | 18.72      | 0.467             | 19.21        |
|                  | bridge                                          | 1.677      | 0.651           | 15.29      | 0.646             | 15.41        |
| <b>topN</b>      | aboveN                                          | 1.497      | 0.909           | 0          | 0.891             | 0            |
|                  | aboveI                                          | 1.51       | 0.945           | 0          | 0.913             | 0            |
|                  | bridge                                          | 1.495      | 0.921           | 0          | 0.890             | 0            |
| <b>apolar</b>    | aboveC                                          | 1.642      | 0.984           | 0          | (0.963            | 0            |
|                  | aboveN                                          | 1.556      | 0.839           | 0          | 0.824             | 0            |
|                  | aboveI                                          | 1.604      | 0.944           | 0          | 0.926             | 0            |
|                  | bridge                                          | 1.587      | 0.894           | 0          | 0.880             | 0            |

**Table S3.** Calculated energy gap  $E_g$ , the dissociated energy of the electron-hole pair  $\Delta E$  and energy conversion efficiency  $\eta$  of a  $\text{CH}_3\text{NH}_3\text{PbI}_3/\text{C}_{60}$  heterojunction with cubic-phase perovskites.  $\Delta E^*$  and  $\eta^*$  denote the dissociated energy and the energy conversion efficiency obtained based on the three-fold degenerate LUMO of  $\text{C}_{60}$  fullerene.

| Surface geometry | Position of $\text{C}_{60}$ on $\text{MAPbI}_3$ | $E_g$ [eV] | $\Delta E$ [eV] | $\eta$ [%] | $\Delta E^*$ [eV] | $\eta^*$ [%] |
|------------------|-------------------------------------------------|------------|-----------------|------------|-------------------|--------------|
| <b>topC</b>      | aboveC                                          | 1.968      | 0.943           | 9.97       | 0.918             | 10.32        |
|                  | aboveI                                          | 0          | 0               | 0          | 0                 | 0            |
|                  | bridge                                          | 1.895      | 0.828           | 11.82      | 0.806             | 12.16        |
| <b>topN</b>      | aboveN                                          | 1.874      | 0.985           | 9.32       | 0.970             | 9.55         |
|                  | aboveI                                          | 1.737      | 0.947           | 8.88       | 0.924             | 9.92         |
|                  | bridge                                          | 1.764      | 0.929           | 9.99       | 0.901             | 10.50        |
| <b>apolar</b>    | aboveC                                          | 1.877      | 0.975           | 9.48       | 0.948             | 9.91         |
|                  | aboveN                                          | 1.881      | 0.954           | 9.84       | 0.938             | 10.09        |
|                  | aboveI                                          | 1.846      | 0.963           | 9.64       | 0.950             | 9.86         |
|                  | bridge                                          | 1.916      | 0.987           | 9.36       | 0.959             | 9.78         |

**Table S4. Calculated binding energies of a CH<sub>3</sub>NH<sub>3</sub>PbI<sub>3</sub>/C<sub>60</sub> heterojunction with tetragonal and cubic perovskites.**

| Surface geometry | Location of C <sub>60</sub> on MAPbI <sub>3</sub> surface | tetragonal MAPbI <sub>3</sub> ( <i>t</i> -MAI) | cubic MAPbI <sub>3</sub> ( <i>c</i> -MAI) |
|------------------|-----------------------------------------------------------|------------------------------------------------|-------------------------------------------|
|                  |                                                           | binding energy [eV]                            | binding energy [eV]                       |
| <b>topC</b>      | aboveC                                                    | -1.717                                         | -4.658                                    |
|                  | aboveI                                                    | -1.021                                         | -                                         |
|                  | bridge                                                    | -1.541                                         | -2.631                                    |
| <b>topN</b>      | aboveN                                                    | -2.737                                         | -6.063                                    |
|                  | aboveI                                                    | -2.973                                         | -6.840                                    |
|                  | bridge                                                    | -2.645                                         | -6.080                                    |
| <b>apolar</b>    | aboveC                                                    | -2.231                                         | -5.026                                    |
|                  | aboveN                                                    | -2.341                                         | -4.774                                    |
|                  | aboveI                                                    | -2.288                                         | -5.187                                    |
|                  | bridge                                                    | -2.333                                         | -5.833                                    |

## Section 2: Optimized structures of MAPbI<sub>3</sub>/C<sub>60</sub> heterojunctions

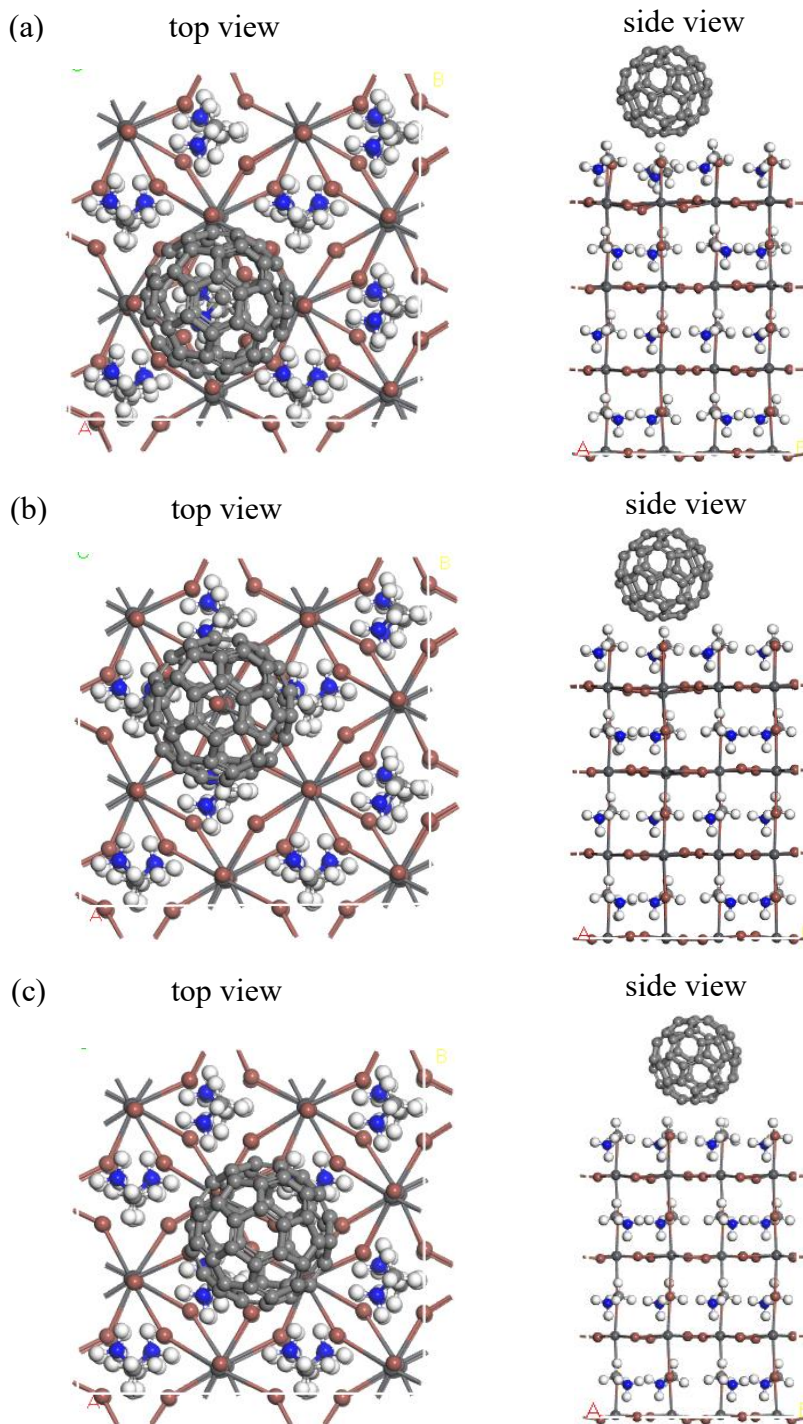

**Figure S1.** Optimized structures of a MAPbI<sub>3</sub>/C<sub>60</sub> heterojunction with tetragonal-phase perovskites. The perovskite has a topC geometry with a fullerene C<sub>60</sub> on the (a) aboveC, (b) aboveI and (c) bridge positions. H, C, N, I, and Pb atoms are represented by the white, light grey, blue, brown, and dark grey spheres, respectively.

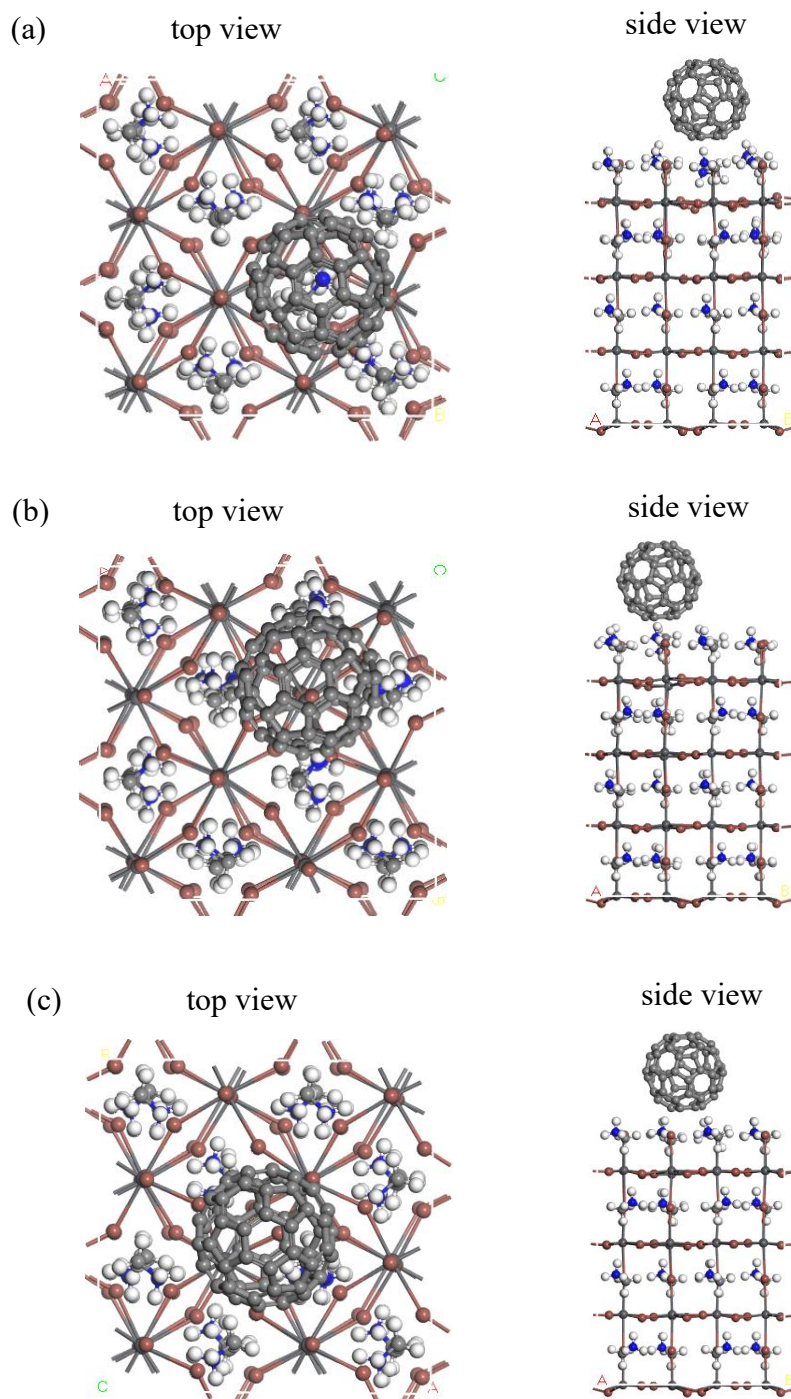

**Figure S2.** Optimized structures of a MAPbI<sub>3</sub>/C<sub>60</sub> heterojunction with tetragonal-phase perovskites. The perovskite has a topN geometry with a fullerene C<sub>60</sub> on the (a) aboveN, (b) aboveI and (c) bridge positions. H, C, N, I, and Pb atoms are represented by the white, light grey, blue, brown, and dark grey spheres, respectively.

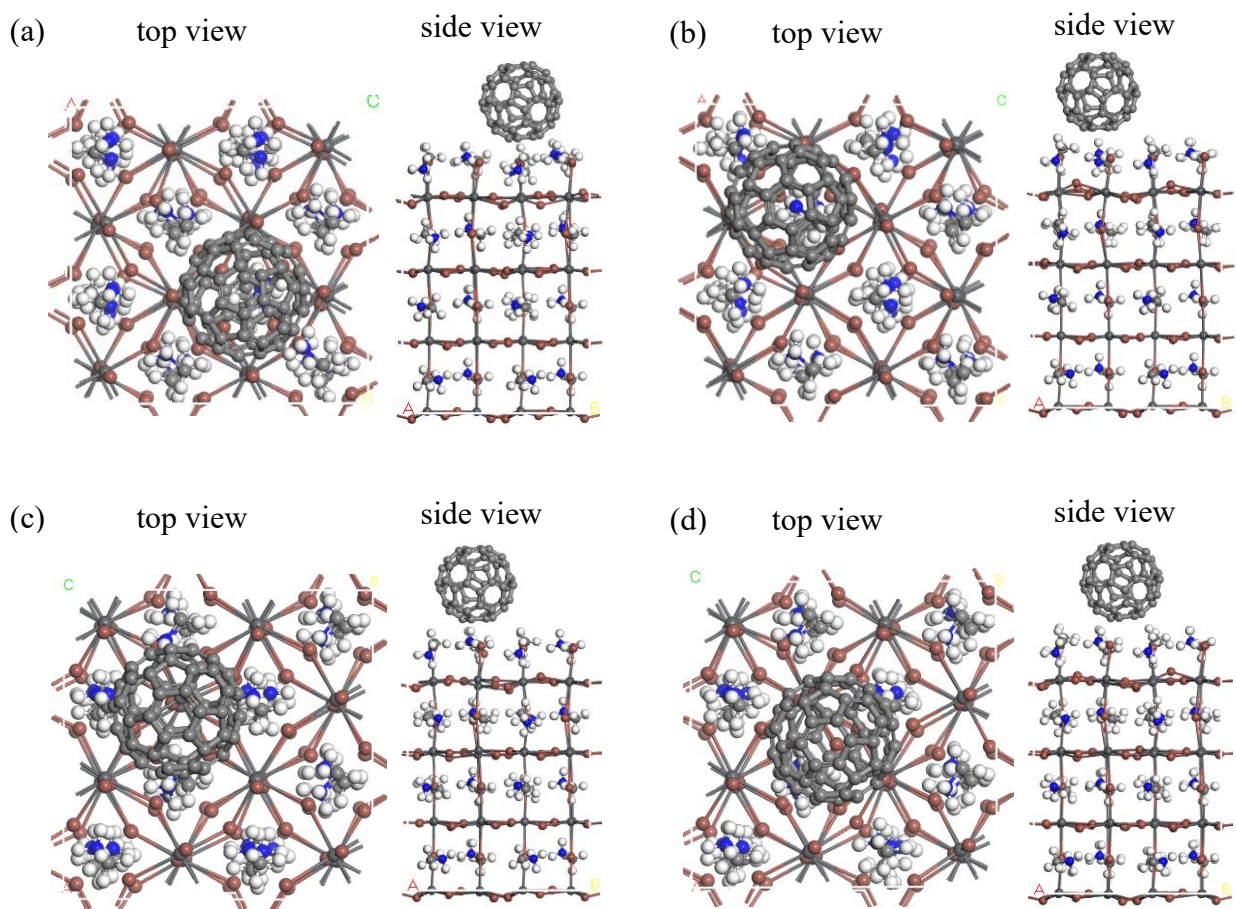

**Figure S3.** Optimized structures of a MAPbI<sub>3</sub>/C<sub>60</sub> heterojunction with tetragonal-phase perovskites. The perovskite has an apolar orientation with a fullerene C<sub>60</sub> on the (a) aboveC, (b) aboveN, (b) aboveI and (c) bridge positions. H, C, N, I, and Pb atoms are represented by the white, light grey, blue, brown, and dark grey spheres, respectively.



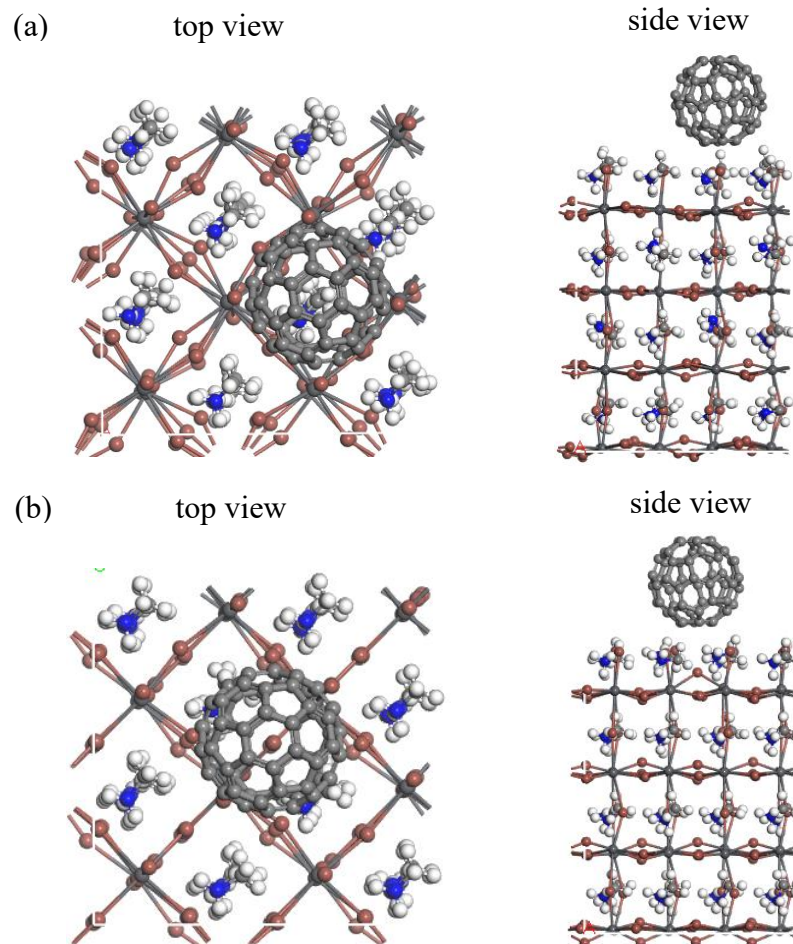

**Figure S4.** Optimized structures of a MAPbI<sub>3</sub>/C<sub>60</sub> heterojunction with cubic-phase perovskites. The perovskite has a topC geometry with a fullerene C<sub>60</sub> on the (a) aboveC and (b) bridge positions. H, C, N, I, and Pb atoms are represented by the white, light grey, blue, brown, and dark grey spheres, respectively.

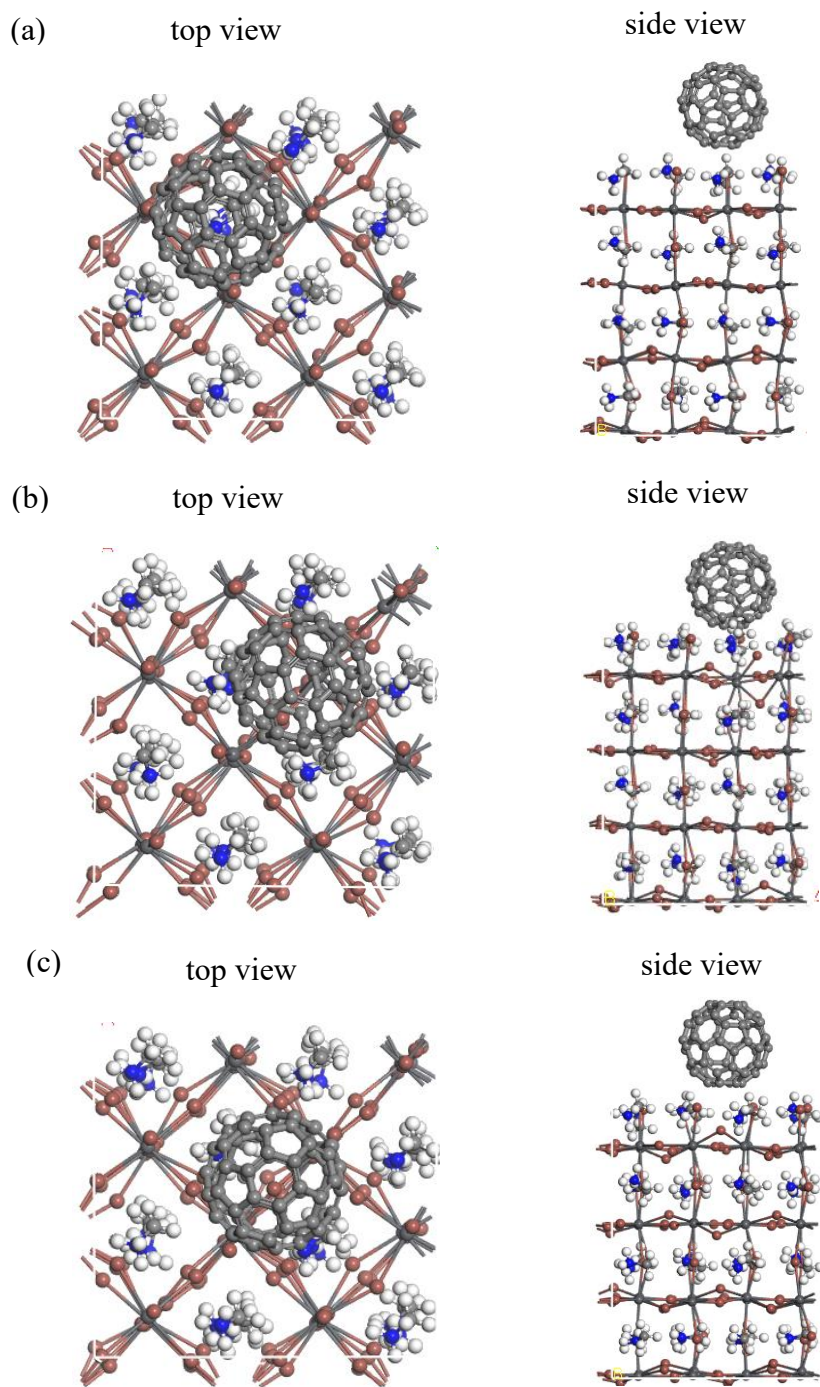

**Figure S5.** Optimized structures of a MAPbI<sub>3</sub>/C<sub>60</sub> heterojunction with cubic-phase perovskites. The perovskite has a topN geometry with a fullerene C<sub>60</sub> on the (a) aboveN, (b) aboveI and (b) bridge positions. H, C, N, I, and Pb atoms are represented by the white, light grey, blue, brown, and dark grey spheres, respectively.

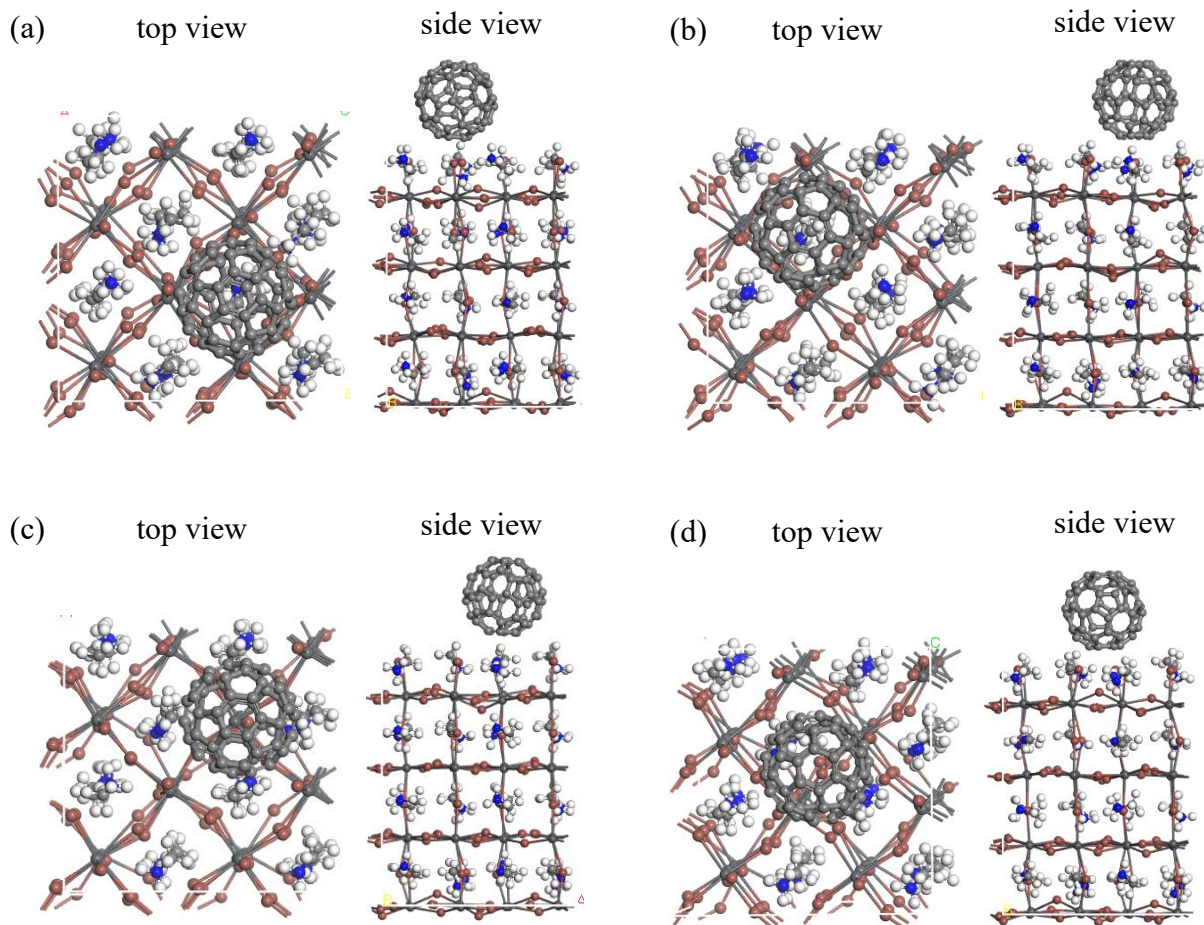

**Figure S6.** Optimized structures of a MAPbI<sub>3</sub>/C<sub>60</sub> heterojunction with cubic-phase perovskites. The perovskite has apolar geometry with a fullerene C<sub>60</sub> on the (a) aboveC, (b) aboveN, (c) aboveI and (d) bridge positions. H, C, N, I, and Pb atoms are represented by the white, light grey, blue, brown, and dark grey spheres, respectively.

### Section 3: Kohn-Sham orbitals and energy eigenvalues of MAPbI<sub>3</sub>/C<sub>60</sub> heterojunctions

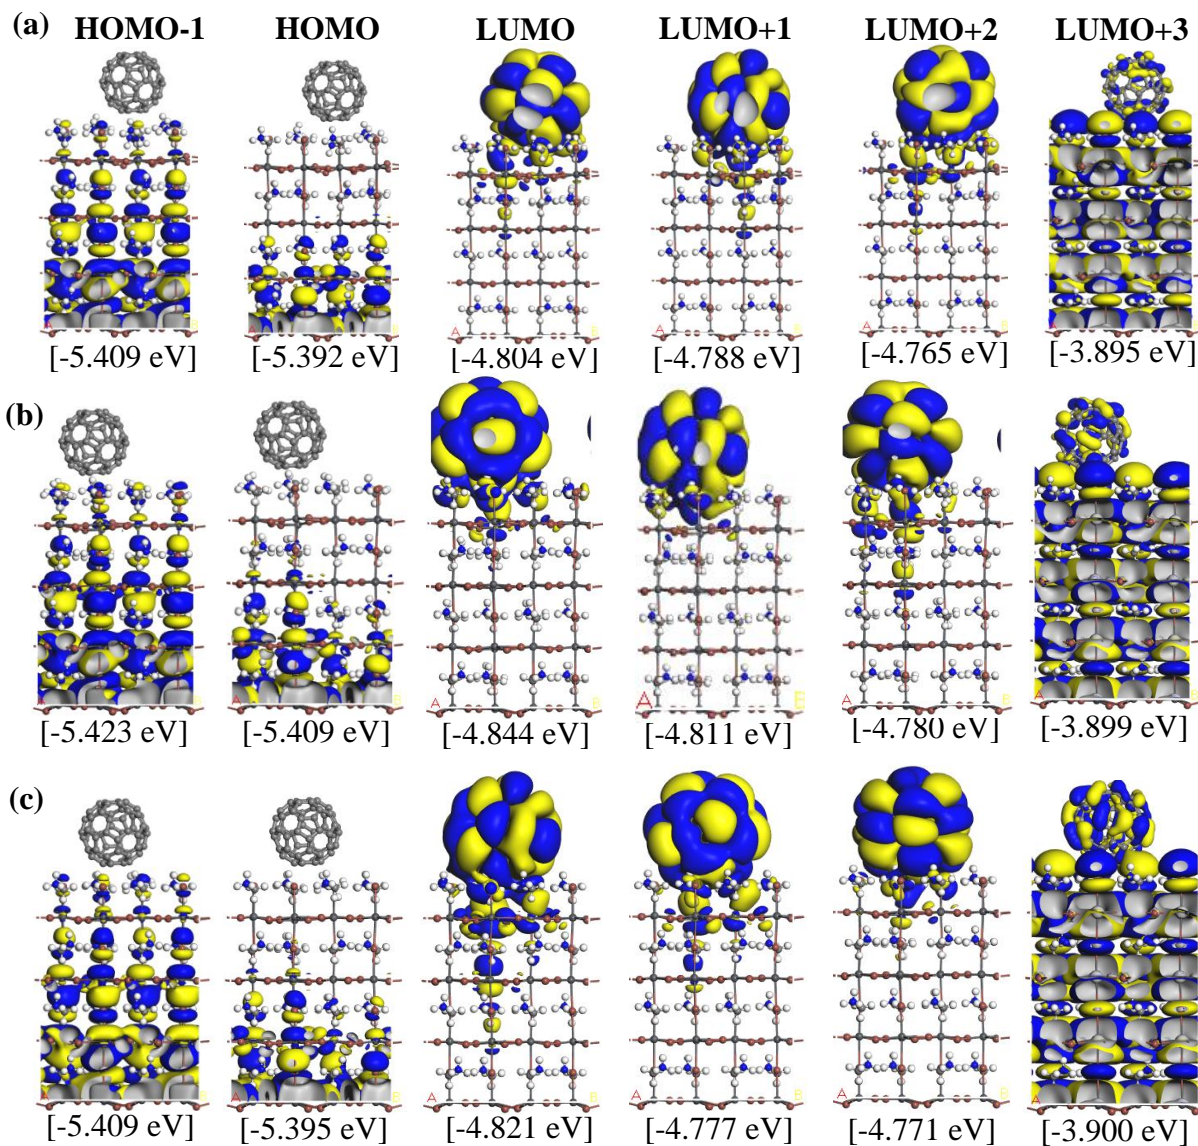

**Figure S7.** Calculated Kohn-Sham orbitals and energy eigenvalues of a MAPbI<sub>3</sub>/C<sub>60</sub> heterojunction with tetragonal MAPbI<sub>3</sub> from HOMO-1 to LUMO+3 levels. Yellow and blue denote plus and minus region of the orbitals. The perovskite has a topN orientation with a fullerene C<sub>60</sub> on the (a) aboveC, (b) aboveI and (c) bridge positions.

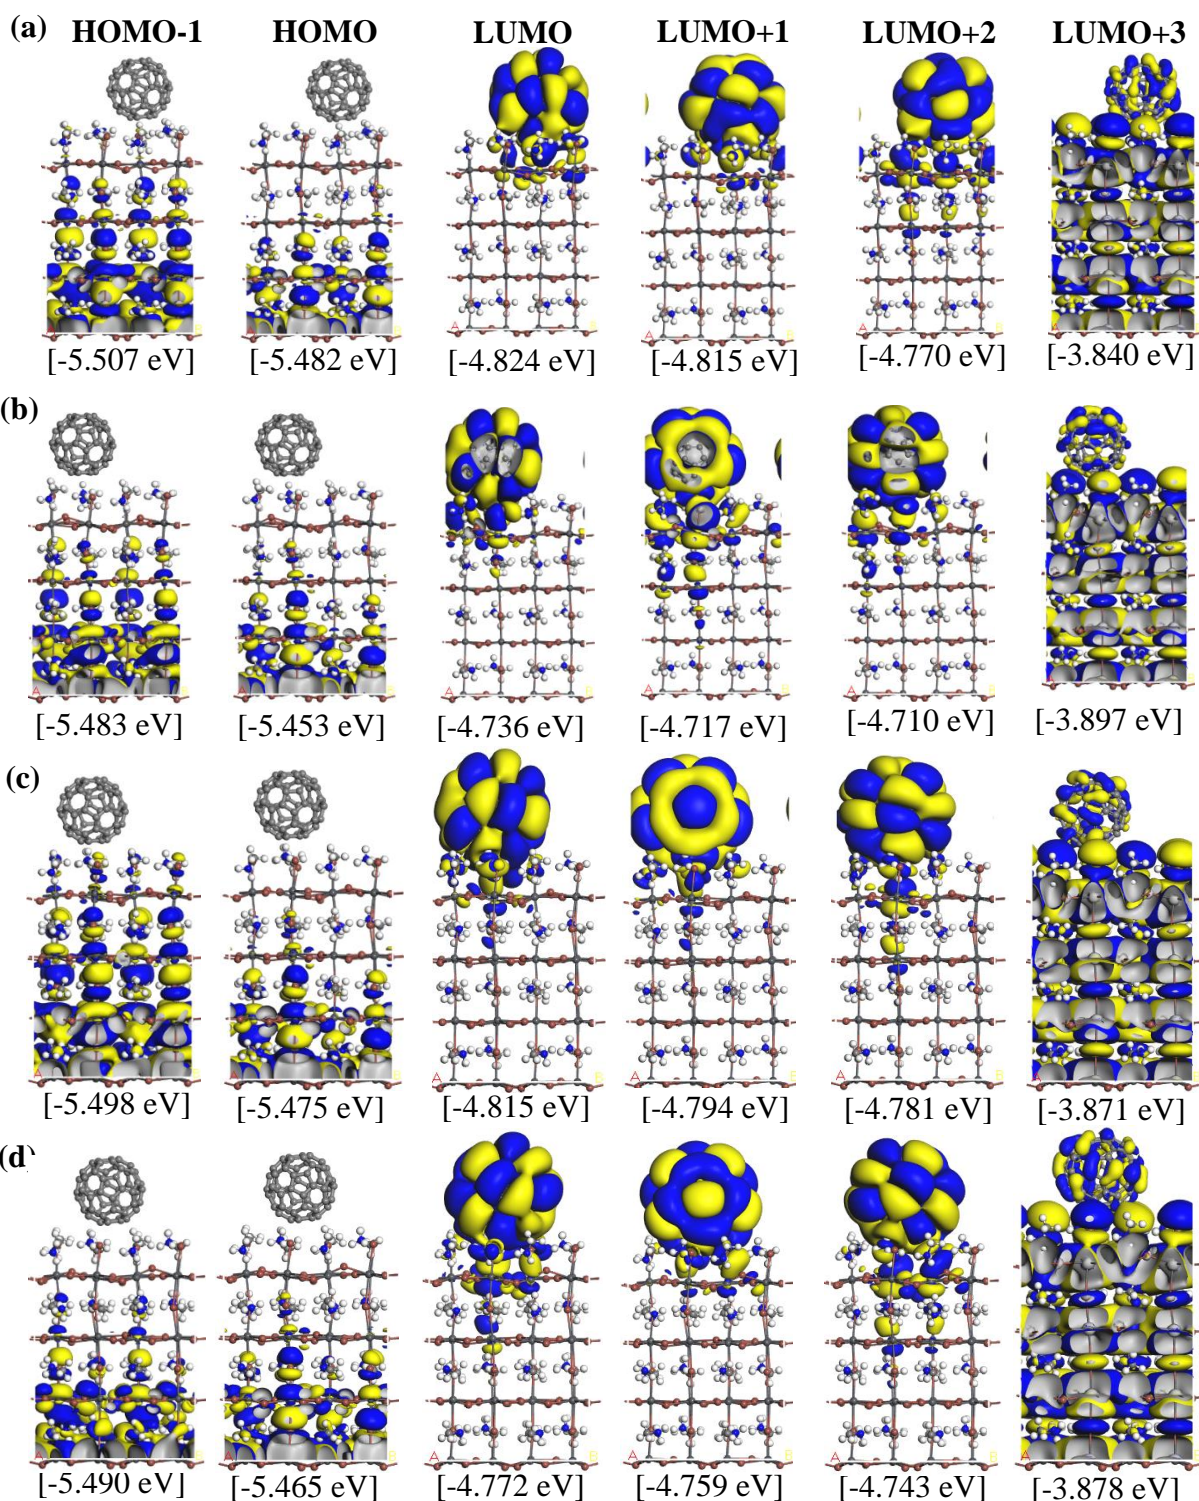

**Figure S8.** Calculated Kohn-Sham orbitals and energy eigenvalues of a MAPbI<sub>3</sub>/C<sub>60</sub> heterojunction with tetragonal MAPbI<sub>3</sub> from HOMO-1 to LUMO+3 levels. Yellow and blue denote plus and minus region of the orbitals. The perovskite has an apolar orientation with a fullerene C<sub>60</sub> on the (a) aboveC, (b) aboveN, (c) aboveI and (d) bridge positions.

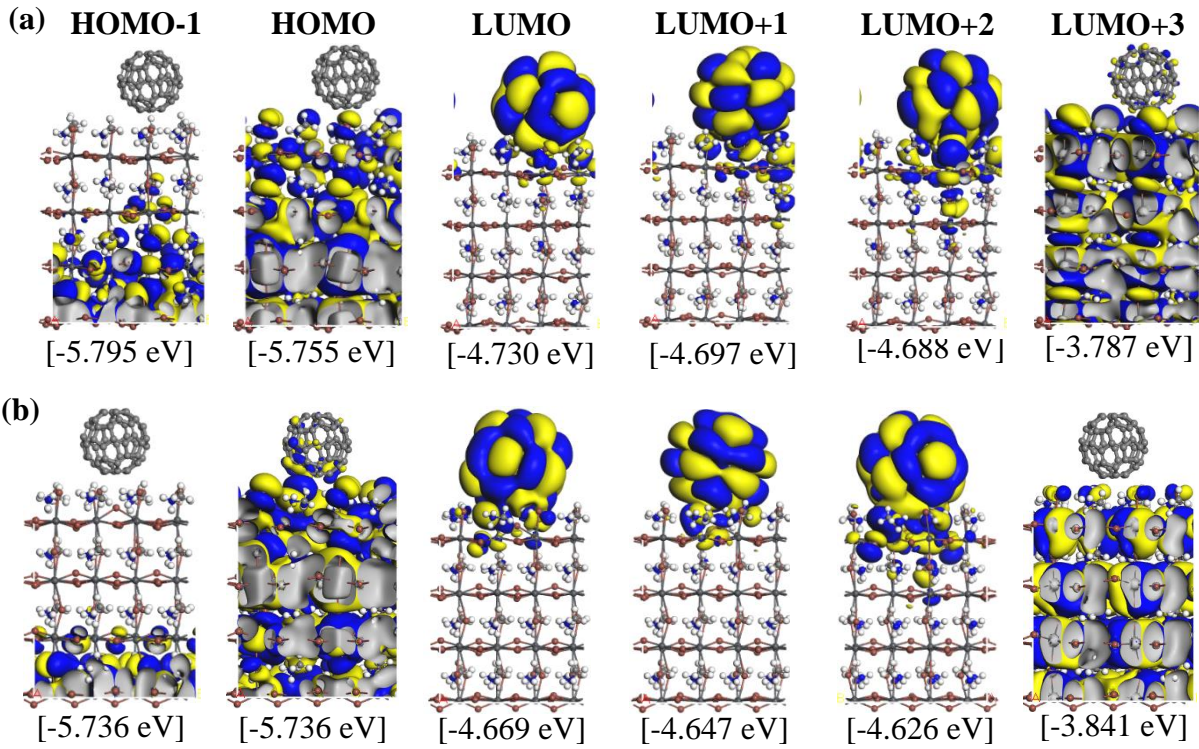

**Figure S9.** Calculated Kohn-Sham orbitals and energy eigenvalues of a MAPbI<sub>3</sub>/C<sub>60</sub> heterojunction with cubic MAPbI<sub>3</sub> from HOMO-1 to LUMO+3 levels. The perovskite has a topC geometry with a fullerene C<sub>60</sub> on the (a) aboveC and (b) bridge positions.

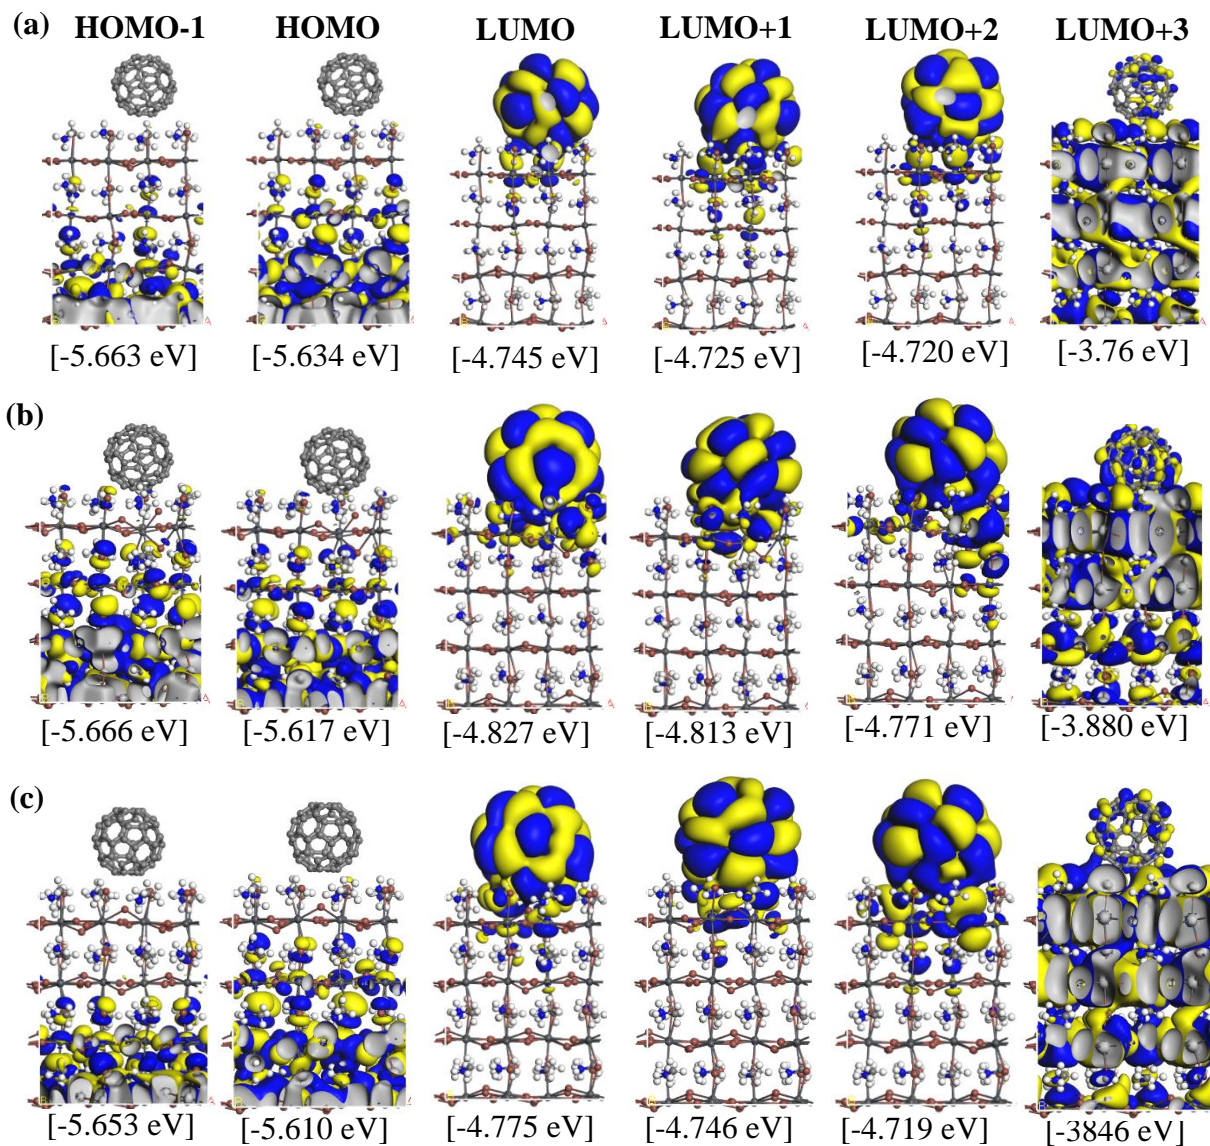

**Figure S10.** Calculated Kohn-Sham orbitals and energy eigenvalues of a MAPbI<sub>3</sub>/C<sub>60</sub> heterojunction with cubic MAPbI<sub>3</sub> from HOMO-1 to LUMO+3 levels. The perovskite has a topN geometry with a fullerene C<sub>60</sub> on the (a) aboveN, (b) aboveI and (c) bridge positions.

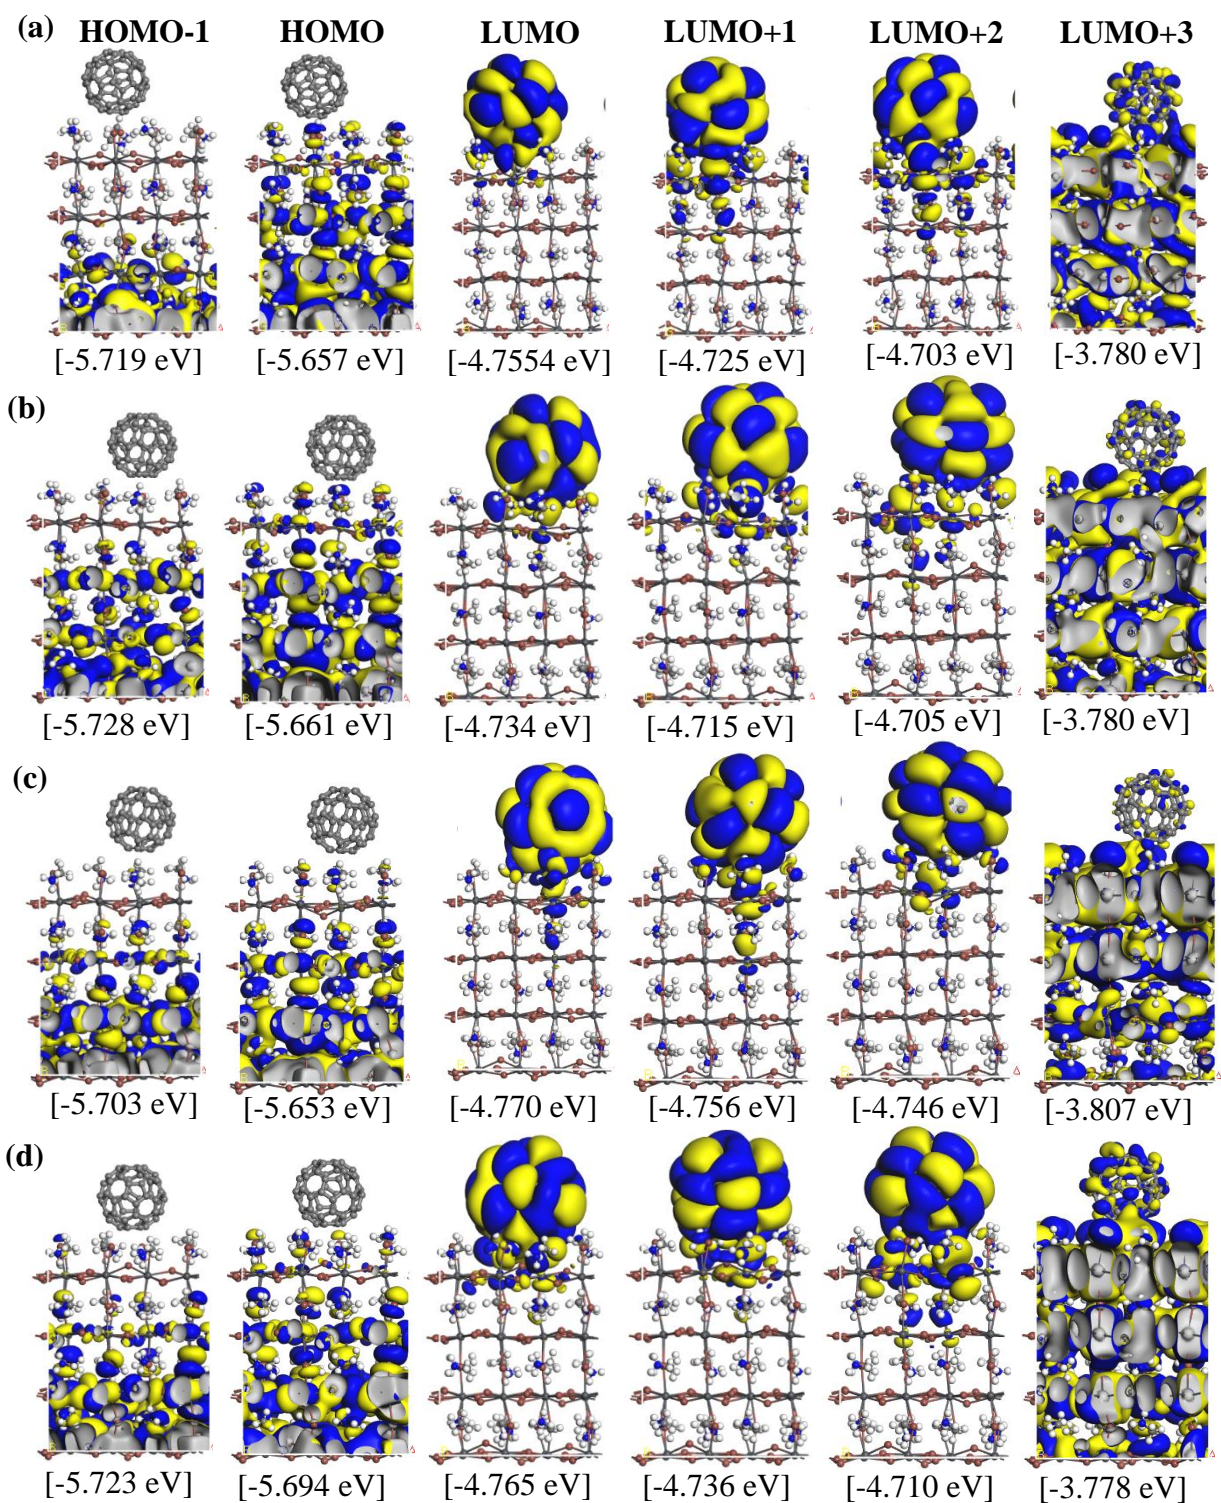

**Figure S11.** Calculated Kohn-Sham orbitals and energy eigenvalues of a MAPbI<sub>3</sub>/C<sub>60</sub> heterojunction with cubic MAPbI<sub>3</sub> from HOMO-1 to LUMO+3 levels. The perovskite has an apolar geometry with a fullerene C<sub>60</sub> on the (a) aboveC, (b) aboveN, (c) aboveI and (d) bridge positions.
